# Supplementary material for: Background noise estimation of the geomagnetic signal
Source: Copernicus journal article supplement (doi:10.5194/gi-7-189-2018), 2018-07-03
Supplement: Supplementary file 1 [file gi-7-189-2018-supplement.zip]

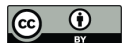

## *Supplement of*

# **Background noise estimation of the geomagnetic signal**

**Xiuyi Yao et al.**

*Correspondence to:* Suqin Zhang (13521519246@139.com)

- gi-7-189-2018-supplement-title-page.pdf
- data.xlsx

The copyright of individual parts of the supplement might differ from the CC BY 4.0 License.
